# Supplementary material
Source: PubMed Central journal article supplement (PMC4727244)
Supplement: NIHMS750966-supplement-supplemental.pdf [file NIHMS750966-supplement-supplemental.pdf]

**Table S1.** Development of embryonal rhabdomyosarcoma in *Trp53<sup>+/-</sup>mdx*, *Trp53<sup>-/-</sup>mdx* and cardiotoxin (Ctx)-treated *Trp53<sup>-/-</sup>* mice

| Age (months)                                                   | Mouse weight (g) | Tumour weight (g)  | Anaplasia | Necrosis | Tumour location              |
|----------------------------------------------------------------|------------------|--------------------|-----------|----------|------------------------------|
| <i>Trp53<sup>+/-</sup>mdx (6 of 34 with multiple tumours)</i>  |                  |                    |           |          |                              |
| 8                                                              | 43.1             | 8.8                | +         | +        | R scapula                    |
| 9                                                              | 40.6             | 1.0,1.2,1.0        | -,-,-     | -,-,-    | R hindlimb, R back, L back   |
| 8                                                              | 36.4             | 7.4                | +         | +        | L abdominal wall             |
| 7                                                              | 34.1             | 5.8                | +         | -        | L hip                        |
| 5                                                              | 28.9             | 4.1                | -         | +        | L forelimb                   |
| 7                                                              | 33.4             | 9.7                | +         | +        | L abdominal wall             |
| 6                                                              | 32.6             | 0.7                | +         | -        | L hip                        |
| 9                                                              | 32.5             | 2.0, 1.0           | -,-       | -,-      | L abdominal wall, R chest    |
| 6                                                              | 29.5             | 2.4                | -         | -        | L back                       |
| 7                                                              | 33.7             | 3.5,1.8            | -,-       | +,+      | L hip, R hip                 |
| 7                                                              | 31.4             | 7.9                | -         | +        | R torso                      |
| 7                                                              | 27.2             | 3.9                | +         | +        | R hip                        |
| 6                                                              | 26.7             | 2.9                | -         | -        | R back                       |
| 9                                                              | 51.6             | 2.6, 12.9          | -,-       | +,+      | R chest, L hip               |
| 7                                                              | 37.7             | 4.1                | -         | +        | R hindlimb                   |
| 9                                                              | 35.0             | 2.5                | +         | +        | R abdominal wall             |
| 6                                                              | 33.7             | 4.2                | +         | +        | L flank                      |
| 11                                                             | 46.9             | 9.5                | +         | +        | R abdominal wall             |
| 8                                                              | 38.4             | 1.9, 1.0, 0.9, 2.6 | +,+,-,-   | +,+,-,-  | Abdomen, R limb, R hip, back |
| 4                                                              | 27.1             | 1.0                | +         | -        | L thorax                     |
| 6                                                              | 33.2             | 1.3                | -         | -        | L thorax                     |
| 6                                                              | 34.9             | 1.2                | +         | -        | L shoulder                   |
| 6                                                              | 29.0             | 1.0                | +         | -        | R shoulder                   |
| 5                                                              | 28.5             | 1.2                | -         | -        | R hip                        |
| 5                                                              | 27.0             | 1.4                | +         | -        | R back                       |
| 11                                                             | 48.0             | 5.6                | +         | +        | R hip                        |
| 4                                                              | 29.7             | 3.3                | -         | +        | R hip                        |
| 5                                                              | 38.9             | 4.9                | +         | +        | R hindlimb                   |
| 3                                                              | 26.9             | 1.6                | -         | -        | L hindlimb                   |
| 8                                                              | 37.1             | 6.4, 2.0, 1.3, 0.7 | -,+,-,-   | -,+,-,-  | L & R hindlimb, R & L flank  |
| 11                                                             | 37.4             | 6.1                | +         | +        | L hindlimb                   |
| 9                                                              | 48.3             | 8.0                | +         | +        | Back                         |
| 9                                                              | 43.1             | 1.7                | +         | -        | L hip                        |
| 7                                                              | 40.3             | 4.2                | -         | +        | R hip                        |
| <i>Trp53<sup>-/-</sup>mdx (10 of 20 with multiple tumours)</i> |                  |                    |           |          |                              |
| 4                                                              | 34.8             | 4.5                | +         | -        | L hip                        |
| 4                                                              | 31.3             | 1.1                | +         | +        | R hip                        |
| 4                                                              | 38.7             | 4.0                | +         | +        | L hindlimb                   |
| 5                                                              | 31.6             | 0.8                | -         | +        | L shoulder                   |
| 4                                                              | 32.0             | 0.9                | +         | +        | L shoulder                   |
| 5                                                              | 36.3             | 2.3                | +         | +        | R hip                        |
| 4                                                              | 36.7             | 1.0, 1.3           | +,-       | +,-      | R hip, L hindlimb            |
| 4                                                              | 31.5             | 2.0, 2.0           | +,+       | +,+      | L & R flank                  |
| 4                                                              | 33.4             | 2.6, 2.4           | +,+       | +,-      | R & L hindlimb               |
| 5                                                              | 33.1             | 2.3, 4.3           | -,+       | +,+      | Flank, L hindlimb            |
| 5                                                              | 36.0             | 3.0                | -         | -        | Abdominal wall               |
| 4                                                              | 34.9             | 1.6                | -         | +        | L hindlimb                   |
| 4                                                              | 41.4             | 2.3, 2.0, 1.2      | +,+,+     | -,+,-    | R Forelimb, L & R hindlimb   |
| 5                                                              | 38.0             | 3.5                | -         | +        | Abdominal wall               |
| 5                                                              | 30.6             | 0.8, 3.2           | +,-       | -,+      | L hindlimb, R abdominal wall |
| 3                                                              | 31.1             | 2.3                | -         | +        | L hindlimb                   |
| 5                                                              | 27.1             | 1.7, 2.1           | +,-       | -,+      | R forelimb, abdominal wall   |
| 4                                                              | 32.8             | 0.42, 0.2          | +,+       | +,+      | L hip, head                  |
| 4                                                              | 31.3             | 0.6, 1.7           | +,-       | +,+      | L & R hip                    |
| 4                                                              | 50.3             | 2.6, 1.7           | -,+       | +,-      | L hindlimb, R hip            |

*Ctx-treated Trp53<sup>-/-</sup> (L hindlimb muscles; 1 of 10 with multiple tumours)*

|     |      |          |     |     |                        |
|-----|------|----------|-----|-----|------------------------|
| 2*  | 14.0 | 0.6      | +   | +   | L hindlimb             |
| 3*  | 24.3 | 1.2      | -   | +   | L hindlimb             |
| 4*  | 23.6 | 1.7      | +   | +   | L hindlimb             |
| 4*  | 25.2 | 1.5      | -   | +   | L hindlimb             |
| 5*  | 23.6 | 1.7      | -   | -   | L hindlimb             |
| 5*  | 28.6 | 1.4      | +   | +   | L hindlimb             |
| 4*  | 28.0 | 1.3      | -   | -   | L hindlimb             |
| 4*  | 26.1 | 0.4, 1.3 | -,+ | -,+ | L hindlimb, L hindlimb |
| 4** | 23.2 | 1.5      | +   | +   | L hindlimb             |
| 5** | 28.1 | 1.3      | -   | -   | L hindlimb             |
| 4** | 23.2 | 1.5      | -   | -   | L hindlimb             |

*Ctx-treated Trp53<sup>+/+</sup> (L hindlimb muscles)*

None

---

\*Injected 1x/7 days from 4 weeks of age onwards.

\*\*Injected 1x/14 days from 4 weeks of age onwards.
